# Supplementary material
Source: publisher figshare collection journal article supplement (https://gsapubs.figshare.com/ndownloader/files/23298251)
Supplement: Supplementary file 1 [file 23298251]

# GSA DATA REPOSITORY 2014348

## Supplementary materials for Seasonal, long-term, and short-term deformation in the Central Range of Taiwan induced by landslides

Ya-Ju Hsu<sup>1</sup>, Rou-Fei Chen<sup>2</sup>, Ching-Wee Lin<sup>3</sup>, Horng-Yue Chen<sup>1</sup>, Shui-Beih Yu<sup>1</sup>

1. Institute of Earth Sciences, Academia Sinica, Taipei, Taiwan

2. Department of Geology, Chinese Culture University, Taipei, Taiwan

3. Department of Earth Sciences, National Cheng Kung University, Tainan, Taiwan

### 1. GPS position time series at sites affected by landslides

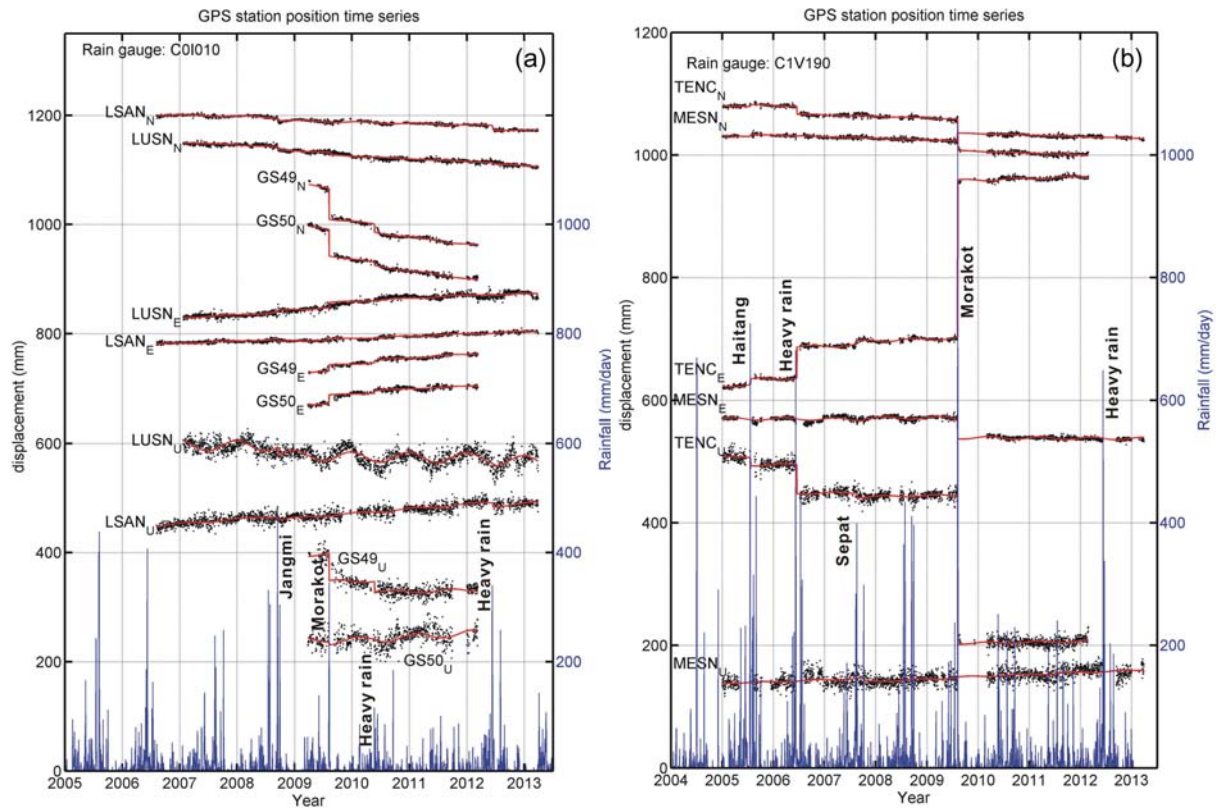

Figure DR1. Black dots denote GPS position time series after removing interseismic velocities and offsets due to instrument changes. Red lines indicate modeled time series. Blue lines show daily rainfall. Rainfall events or typhoons caused significant surface displacements are shown as black texts. Locations of sites are shown in Figure 1A.

## 2. The time and durations of heavy rains and typhoons in this study

Table DR1. Time and durations of heavy rains and typhoons in the study period

| Event           | Date                  | Day of year |
|-----------------|-----------------------|-------------|
| 2005 Haitang    | 2005/07/16-2005/07/20 | 197-201     |
| 2006 Heavy rain | 2006/06/05-2006/06/12 | 156-163     |
| 2007 Sepat      | 2007/08/16-2007/08/19 | 228-231     |
| 2007 Krosa      | 2007/10/04-2007/10/07 | 277-280     |
| 2008 Jangmi     | 2008/09/26-2008/09/29 | 270-273     |
| 2009 Morakot    | 2009/08/05-2009/08/10 | 217-222     |
| 2010 Heave rain | 2010/05/21-2010/05/24 | 141-144     |
| 2012 Heave rain | 2012/06/08-2012/06/12 | 160-164     |

## 3. Interpolated interseismic vertical velocities

The interseismic uplift rates in the Lushan area are the largest in central Taiwan (inset on bottom right of Figure 1A); while the cGPS sites here are affected by landslides and not used for interpolation of interseismic velocity field. The interpolated interseismic vertical velocities (Figure DR2) at sites in Lushan are likely to be underestimated, resulting in estimates of long-term uplift due to landslides.

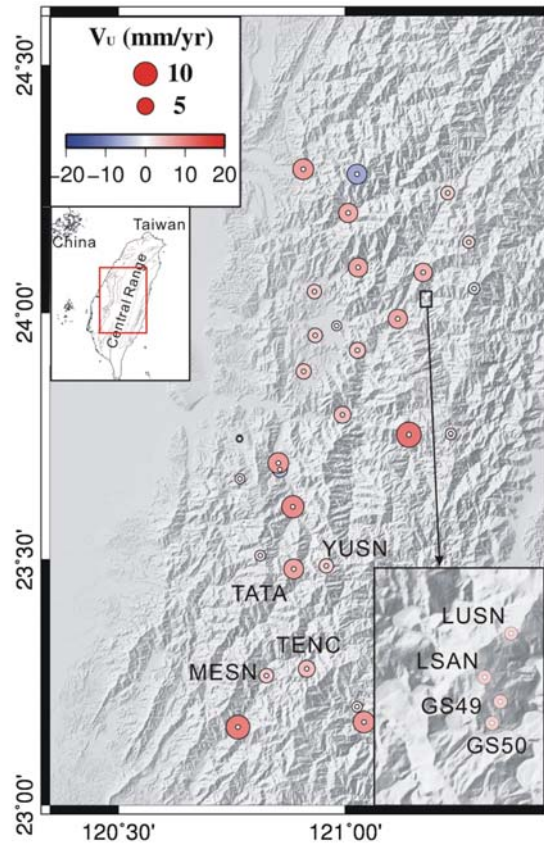

Figure DR2. Interseismic GPS vertical velocities in the Central Range of Taiwan. Vertical rates at sites affected by landslides (station name are shown) are interpolated from the adjacent stable cGPS sites.

#### 4. Topography and time series of station position at TENC

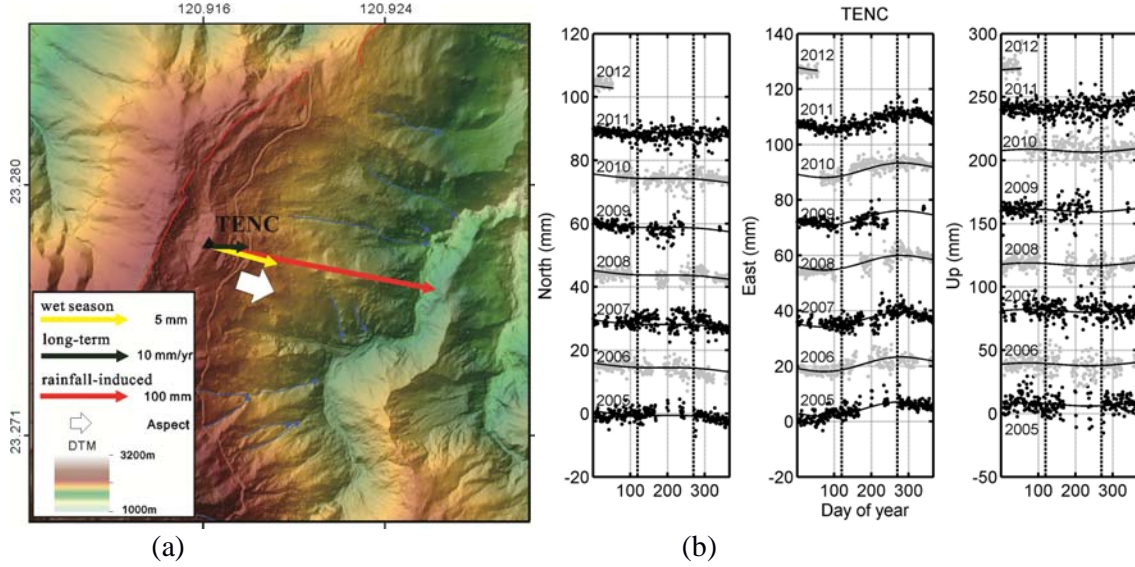

Figure DR3. (a) Topography derived from LiDAR (1 m  $\times$  1 m). Red and blue lines indicate fault scarps and gullies, respectively. Red vectors indicate GPS displacements of the largest rainfall-induced landslide from 2005 to 2013 (Table DR3). Black and yellow vectors indicate landslide-induced long-term linear rates and additional motions in the wet season, respectively. White vector denotes aspect of slope derived from LiDAR. (b) GPS time series of north, earth, and vertical components. We add a constant offset and switch color between black and gray every year for better visualization. Solid line is the model with a landslide-induced long-term linear rate and periodic annual motions.

#### 5. Landslide-induced long-term secular motion, motions in the wet season and during the largest rainfall-driven landslides from 2005 to 2013

Landslide induced long-term linear rates are estimated from the differences between original long-term linear velocities at unstable sites (blue vectors in Figure 1A) and the interpolated interseismic velocities (black vectors).

Table DR2. Rates and directions of landslide-induced long-term secular motions and additional GPS motions in the wet season. Slope and aspect of each hillslope are derived from LiDAR.

|      | Landslide-induced long-term motion |       |       |       |                     | Additional motion in the wet season |      |       |     |                     | LiDAR                 |                        |
|------|------------------------------------|-------|-------|-------|---------------------|-------------------------------------|------|-------|-----|---------------------|-----------------------|------------------------|
|      | $V_E$<br>(mm/yr)                   | $V_N$ | $V_U$ | $V_H$ | Azi<br>( $^\circ$ ) | dE<br>(mm)                          | dN   | dU    | dH  | Azi<br>( $^\circ$ ) | Slope<br>( $^\circ$ ) | Aspect<br>( $^\circ$ ) |
| GS49 | 6.9                                | -13.5 | 2.1   | 15.1  | 153                 | 2.2                                 | -3   | -5.6  | 3.7 | 144                 | 25                    | 163                    |
| GS50 | 4.8                                | -14.4 | 6.9   | 15.2  | 161                 | 1.4                                 | -2   | 11.2  | 2.4 | 145                 | 12                    | 163                    |
| LUSN | 5.8                                | -5.0  | -1.2  | 7.7   | 131                 | 2                                   | -1   | -18.8 | 2.2 | 117                 | 30                    | 132                    |
| LSAN | 4.5                                | -2.4  | 8.5   | 5.1   | 118                 | 2.2                                 | -2.6 | -3.2  | 3.4 | 140                 | 32                    | 163                    |
| YUSN | -6.2                               | -2.6  | -8.3  | 6.7   | 247                 | -1.2                                | 2    | -4    | 2.3 | 335                 | 40                    | 225                    |
| TATA | -12.4                              | 5.6   | -0.3  | 13.6  | 294                 | -5.0                                | 4.6  | -1.8  | 6.8 | 313                 | 38                    | 306                    |
| TENC | 4.1                                | -0.1  | 2.5   | 4.1   | 91                  | 3.8                                 | -1   | -3    | 3.9 | 105                 | 35                    | 108                    |
| MESN | 2.4                                | -2.2  | -0.5  | 3.3   | 131                 | -4.4                                | -0.8 | 2.6   | 4.5 | 260                 | 12                    | 265                    |

Table DR3. GPS surface displacements of the largest rainfall-induced landslides from 2005 to 2013. Slope and aspect of each hillslope are derived from LiDAR.

| Displacements of the largest rainfall-induced landslide |            |            |            |            |            |               | LiDAR        |               |
|---------------------------------------------------------|------------|------------|------------|------------|------------|---------------|--------------|---------------|
| Event                                                   | dE<br>(mm) | dN<br>(mm) | dU<br>(mm) | dH<br>(mm) | Azi<br>(°) | Plunge<br>(°) | Slope<br>(°) | Aspect<br>(°) |
| GS49 2009 Morakot                                       | 9.7        | -56.4      | -49.8      | 57.2       | 170        | 41            | 25           | 163           |
| GS50 2009 Morakot                                       | 16.0       | -48.6      | 5.2        | 51.2       | 162        | 6             | 12           | 163           |
| LUSN 2008 Jangmi                                        | 3.8        | -6.0       | -16.8      | 7.1        | 148        | 67            | 30           | 132           |
| LSAN 2012 heavy rain                                    | 0.2        | -7.2       | -7.4       | 7.2        | 178        | 46            | 32           | 163           |
| YUSN 2009 Morakot                                       | -41.9      | -6.2       | -41.8      | 42.4       | 262        | 45            | 40           | 225           |
| TATA 2009 Morakot                                       | -46.8      | 20.9       | -28.1      | 51.3       | 294        | 29            | 38           | 306           |
| TENC 2009 Morakot                                       | 256.9      | -51.7      | -241.9     | 262.1      | 101        | 43            | 35           | 108           |
| MESN 2009 Morakot                                       | -33.0      | -12.2      | 3.4        | 35.2       | 250        | 6             | 12           | 265           |

## 6. Rainfall-induced landslides at site TENC during the 2009 Typhoon Morakot

The TENC site started to move when the amount of cumulative rainfall increase to 1000 mm and then the motion was accelerated when the cumulative rainfall was up to 2000 mm and slowed down two days later after rain stopped.

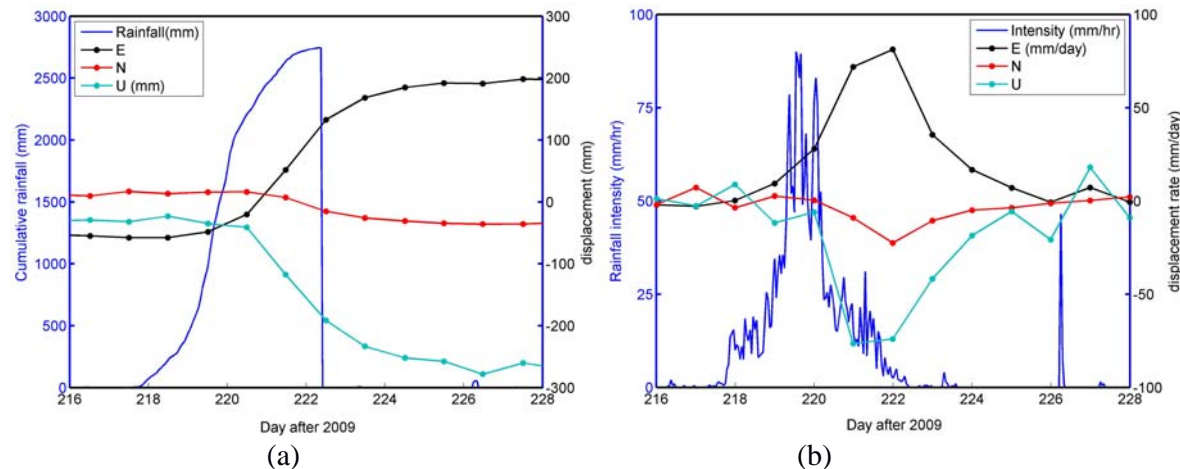

Figure DR4. Relations between the rainfall and GPS displacements during the 2009 Typhoon Morakot. (a) Blue curve denotes cumulative rainfall during Typhoon Morakot. Black, red, and light blue curves indicate GPS position time series of east, north and vertical components, respectively. (b) Blue curve denotes rainfall intensity (mm/hr) during the Typhoon Morakot. Black, red, and light blue curves indicate GPS displacement rates of east, north and vertical components, respectively.

## 7. Relations between seismic activity and landslides

Locations of landslides discovered in this study are correlated neither with the earthquake density, nor with the cumulative seismic moment. This observation is consistent with rainfall-driven landslides. More detailed information about earthquake-triggered landslides can be found at Meunier et al. (2008).



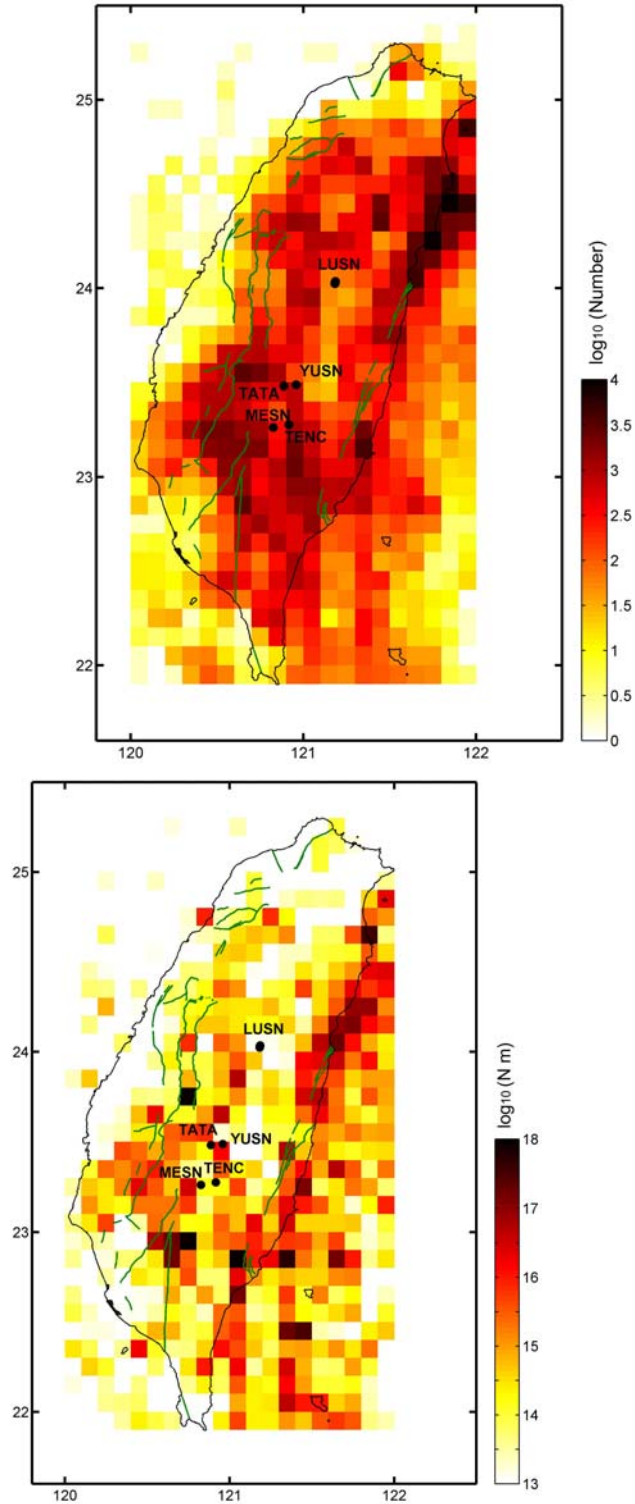

4.

(b)

Figure DR5. Spatial distributions of earthquake density and seismic moment from 2005 to 2012. (a) Color scale indicates earthquake density at each  $0.1^\circ \times 0.1^\circ$  grid cell. The seismic catalog is obtained from the Central Weather Bureau of Taiwan. Green lines show major faults. Black dots denote GPS sites affected by landslides. (b) Color scale indicates cumulative seismic moment from 2005 to 2012 at each  $0.1^\circ \times 0.1^\circ$  grid cell

## 8. Relations between the amplitude of surface displacements, the maximum rainfall intensity, and the cumulative rainfall at each event

We plot landslides events in the study period from 2005 to 2013. Time and durations of heavy rains or typhoons at each event are shown in Table DR1.

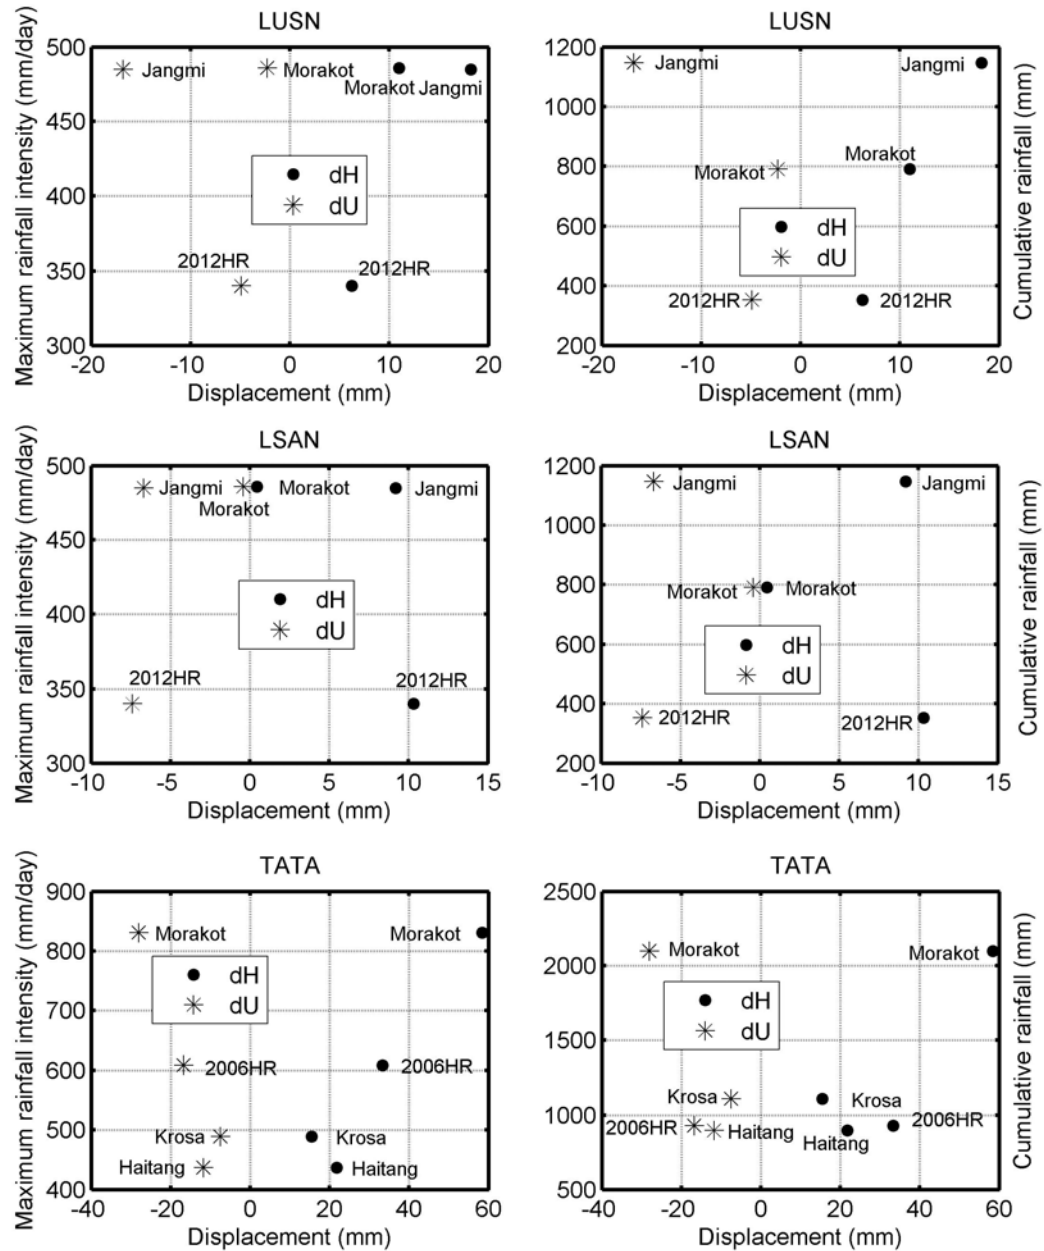

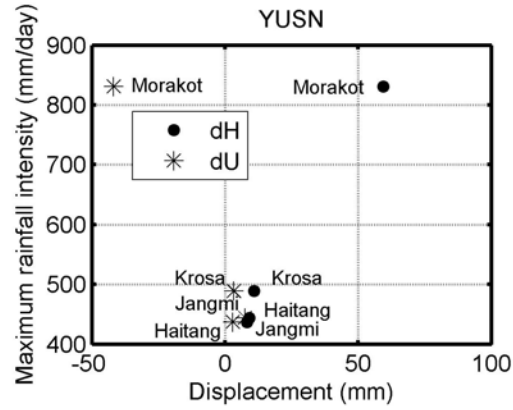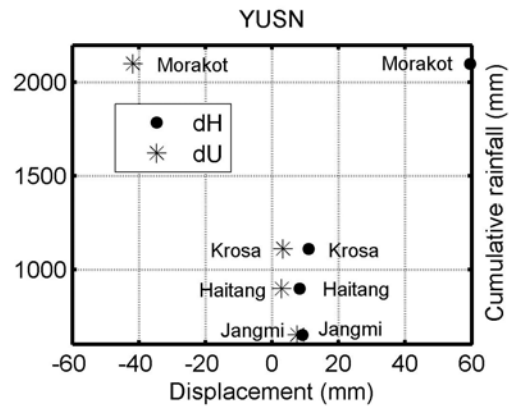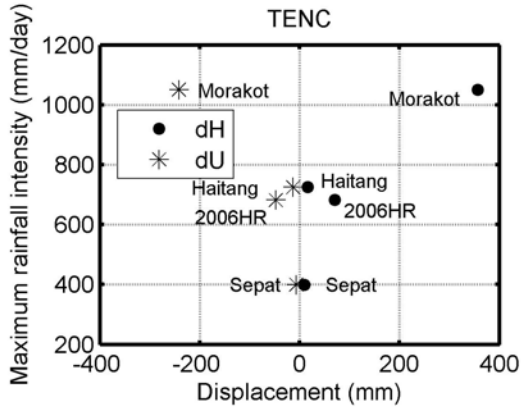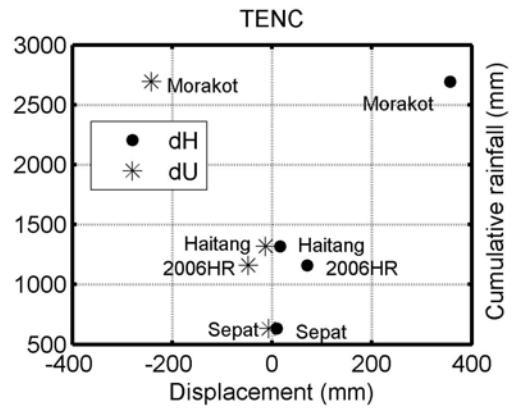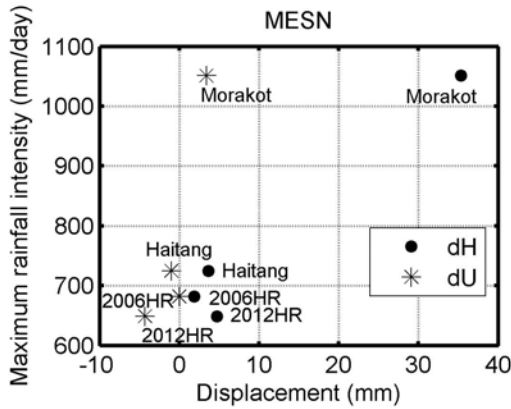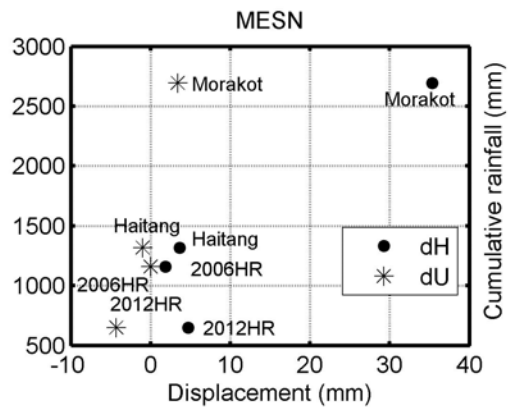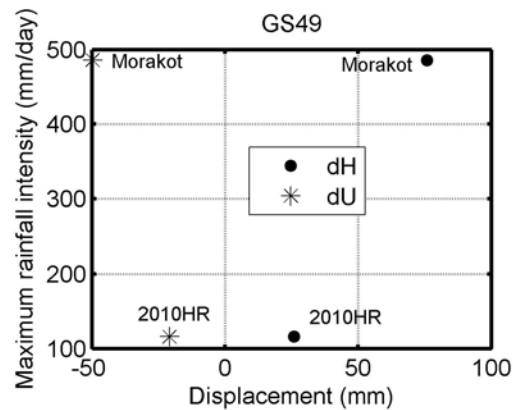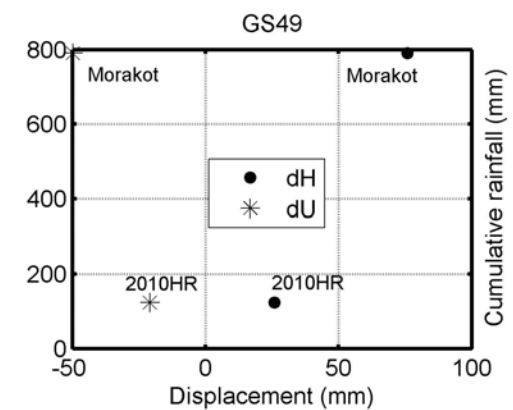

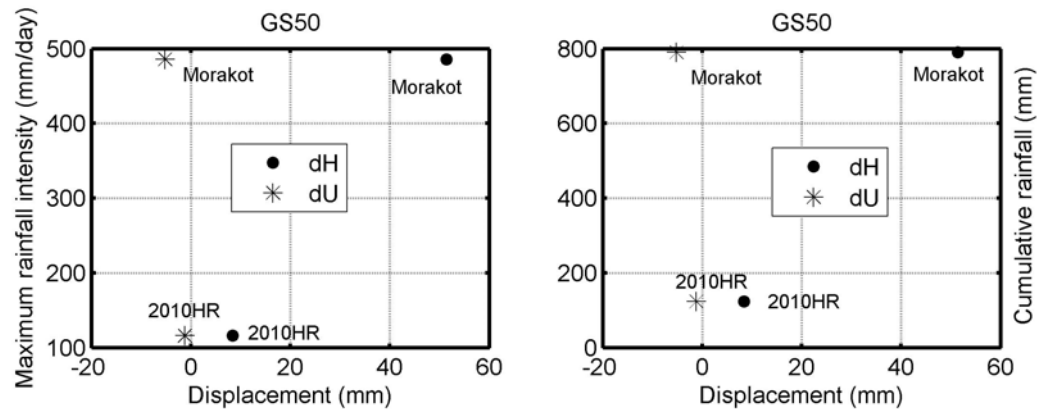

Figure DR6. Left and right panels show the relationships between the maximum rainfall intensity and GPS displacements at each event and between the cumulative rainfall and GPS displacements at each event, respectively. “dH” and “dU” denote GPS horizontal and vertical displacements associated with landslides. “HR” represents for Heavy Rain.

## References

- Chen C.-H., H.-C. Ho, K.-S. Shea, W. Lo, W.-H. Lin, H.-C., Cheng, C.-S. Huang, C.-W. Lin, G.-H. Chen, C.-N. Yang and Y.-H. Lee, 2000, Geologic map of Taiwan, Central Geological Survey, Ministry of Economic Affairs.
- Meunier, P., Hovius, N., and Haines, J. A., 2008, Topographic site effects and the location of earthquake induced landslides: Earth and Planetary Science Letters, v. 275, no. 3-4, p. 221-232.
